# Supplementary material
Source: PubMed Central journal article supplement (PMC8055946)
Supplement: mmc1.pdf [file mmc1.pdf]

## **Supplementary material**

### **Table of content**

#### **Supplemental Methods**

**Table S1. Characteristics of patients according to late serological status**

**Table S2. Characteristics of patients according to early serological status**

**Table S3. Characteristics of patients according to previous COVID-19 history.**

**table S4. Characteristics of infection-naive patients according to early serological status.**

**Table S5. Characteristics of infection-naive patients according to late serological status.**

## **Supplemental Methods**

Patients received a first dose of BNT162b2 mRNA vaccine in late January 2021 in a single hemodialysis center in Sarcelles, France. A second injection was performed 4 weeks later. Humoral response was evaluated weekly until week 7 post-first injection. Samples within 2 days prior to vaccination were considered as baseline. Early serological status was evaluated at week 4 (before second injection). Late serological status was evaluated at last follow-up, after 2 vaccine injections. Previous SARS-CoV-2 infection was characterized by positive baseline serology or known history of SARS-CoV-2 infection. Previous history of COVID-19, and general characteristics were reported. Immunocompromised status was defined by ongoing immunosuppressive treatment, previous transplant, human immunodeficiency infection (HIV) infection, chemotherapy in the past 6 months. Informed consent was obtained from each patient. Categorical and continuous variables were respectively expressed as count (percentage) and median (IQR). When appropriate, Chi-2 or Fisher exact test were used for categorical comparison and t-test or Mann-Whitney for continuous variable. Mixed-model approach was used to compare repeated measures of SARS-CoV-2 antibody titers over time between patients with previous history of SARS-CoV-2 infection or not. Results were analyzed with Graph Pad Prism software version 9.0.0 and R software version 4.0.3.

**Table S1. Characteristics of patients according to late serological status**

| <b>VARIABLE</b>                             | <b>ALL PATIENTS<br/>N = 64</b> | <b>SEROPOS.<br/>N = 55</b> | <b>SERONEG.<br/>N = 9</b> | <b>P VALUE</b> |
|---------------------------------------------|--------------------------------|----------------------------|---------------------------|----------------|
| Age (years), mean (SD)                      | 70 (11.8)                      | 68 (11)                    | 83 (6.7)                  | <0.001         |
| Age > 70 years, n (%)                       | 37 (57.8)                      | 28 (50)                    | 9 (100)                   | 0.006          |
| Male, n (%)                                 | 50 (78.1)                      | 44 (80)                    | 6 (66.6)                  | 0.370          |
| Cause of nephropathy                        |                                |                            |                           | 0.826          |
| Diabetes and/or vascular nephropathy, n (%) | 50 (78)                        | 42 (75)                    | 8 (88)                    | -              |
| Glomerular disease, n (%)                   | 6 (9)                          | 6 (11)                     | 0 (0)                     | -              |
| Other, n (%)                                | 8 (13)                         | 7 (14)                     | 1 (12)                    | -              |
| <b>Comorbidities</b>                        |                                |                            |                           |                |
| Diabetes mellitus, n (%)                    | 37 (57.8)                      | 32 (58.1)                  | 5 (55.5)                  | 0.882          |
| Hypertension, n (%)                         | 61 (95.3)                      | 52 (94.5)                  | 9 (100)                   | 0.473          |
| Immunocompromised, n (%)                    | 8 (12.5)                       | 7 (12.7)                   | 1 (11.1)                  | 1              |
| <b>Characteristics</b>                      |                                |                            |                           |                |
| History of covid infection, n (%)           | 12 (19)                        | 12 (22)                    | 0 (0)                     | 0.189          |

**Table S2. Characteristics of patients according to early serological status**

| <b>VARIABLE</b>                             | <b>ALL PATIENTS<br/>N = 69</b> | <b>EARLY SEROPOS.<br/>N = 23</b> | <b>EARLY SERONEG.<br/>N = 46</b> | <b>P VALUE</b> |
|---------------------------------------------|--------------------------------|----------------------------------|----------------------------------|----------------|
| Age (years), mean (SD)                      | 70 (11.9)                      | 71 (11.6)                        | 68 (12.6)                        | 0.284          |
| Age > 70 years, n (%)                       | 41 (59)                        | 12 (52)                          | 29 (63)                          | 0.386          |
| Male, n (%)                                 | 54 (77.9)                      | 17 (73.9)                        | 37 (80.4)                        | 0.536          |
| Cause of nephropathy                        |                                |                                  |                                  | 1              |
| Diabetes and/or vascular nephropathy, n (%) | 52 (77)                        | 17 (78)                          | 35 (76)                          | -              |
| Glomerular disease, n (%)                   | 7 (10)                         | 2 (9)                            | 5 (11)                           | -              |
| Other, n (%)                                | 10 (13)                        | 3 (13)                           | 7 (13)                           | -              |
| <b>Comorbidities</b>                        |                                |                                  |                                  |                |
| Diabetes mellitus, n (%)                    | 40 (58.8)                      | 12 (54.5)                        | 28 (60.8)                        | 0.490          |
| Hypertension, n (%)                         | 66 (95.7)                      | 23 (100)                         | 43 (93.4)                        | 0.210          |
| Immunocompromised, n (%)                    | 8 (11.6)                       | 1 (4.4)                          | 7 (15.2)                         | 0.253          |
| <b>Characteristics</b>                      |                                |                                  |                                  |                |
| History of covid infection, n (%)           | 13 (18.8)                      | 13 (56.5)                        | 0 (0)                            | <0.0001        |

**Table S3. Characteristics of patients according to previous COVID-19 history.**

| <b>VARIABLE</b>                             | <b>ALL PATIENTS<br/>N = 69</b> | <b>NO COVID HIST.<br/>N = 56</b> | <b>COVID HIST.<br/>N = 13</b> | <b>P VALUE</b> |
|---------------------------------------------|--------------------------------|----------------------------------|-------------------------------|----------------|
| Age (years), mean (SD)                      | 70 (11.9)                      | 71 (11.5)                        | 69 (13.5)                     | 0.705          |
| Age > 70 years, n (%)                       | 55 (79)                        | 45 (78)                          | 10 (77)                       | 0.872          |
| Male, n (%)                                 | 55 (79)                        | 45 (78)                          | 10 (77)                       | 0.872          |
| Cause of nephropathy                        |                                |                                  |                               | 1              |
| Diabetes and/or vascular nephropathy, n (%) | 53 (76)                        | 43 (75)                          | 10 (77)                       | -              |
| Glomerular disease, n (%)                   | 7 (10)                         | 6 (8)                            | 1 (11)                        | -              |
| Other, n (%)                                | 10 (14)                        | 8 (14)                           | 2 (15)                        | -              |
| <b>Comorbidities</b>                        |                                |                                  |                               |                |
| Diabetes mellitus, n (%)                    | 40 (57)                        | 33 (58)                          | 7 (54)                        | 0.790          |
| Hypertension, n (%)                         | 67 (96)                        | 54 (95)                          | 13 (100)                      | 0.398          |
| Immunocompromised, n (%)                    | 8 (11)                         | 7 (12)                           | 1 (8)                         | 1              |
| <b>Characteristics</b>                      |                                |                                  |                               |                |
| Early positive serology, n (%)              | 23 (33)                        | 10 (18)                          | 13 (100)                      | <0.0001        |
| Mean anti-S level, w4(SD)                   | 10.4 (20.2)                    | 1.8 (5.9)                        | 48.5(16.2)                    | <0.0001        |
| Late positive serology, n (%)               | 55/64 (86)                     | 43/52 (83)                       | 12/12 (100)                   | 0.120          |
| Mean anti-S level, w6-7(SD)                 | 28.1 (22.5)                    | 16.8(14.9)                       | 52.3(15.5)                    | <0.0001        |

**Table S4. Characteristics of infection-naive patients according to early serological status.**

| <b>VARIABLE</b>                             | <b>ALL PATIENTS<br/>N = 56</b> | <b>SEROPOS.<br/>N = 10</b> | <b>SERONEG.<br/>N = 46</b> | <b>P VALUE</b> |
|---------------------------------------------|--------------------------------|----------------------------|----------------------------|----------------|
| Age (years), mean (SD)                      | 71 (11.6)                      | 67 (11.7)                  | 71 (11.5)                  | 0.239          |
| Age > 70 years, n (%)                       | 33 (59)                        | 4 (40)                     | 29 (63)                    | 0.179          |
| Male, n (%)                                 | 44 (79)                        | 7 (70)                     | 37 (80)                    | 0.466          |
| Cause of nephropathy                        |                                |                            |                            | 1              |
| Diabetes and/or vascular nephropathy, n (%) | 43 (77)                        | 8 (80)                     | 35 (76)                    |                |
| Glomerular disease, n (%)                   | 6 (11)                         | 1 (10)                     | 5 (11)                     |                |
| Other, n (%)                                | 7 (12)                         | 1 (10)                     | 6 (13)                     |                |
| <b>Comorbidities</b>                        |                                |                            |                            |                |
| Diabetes mellitus, n (%)                    | 33 (59)                        | 5 (50)                     | 28 (61)                    | 0.527          |
| Hypertension, n (%)                         | 53 (95)                        | 10 (100)                   | 43 (93)                    | 0.406          |
| Immunocompromised, n (%)                    | 7 (13)                         | 0 (0)                      | 7 (15)                     | 0.330          |

**Table S5. Characteristics of infection-naive patients according to late serological status.**

| <b>VARIABLE</b>                             | <b>ALL PATIENTS<br/>N = 52</b> | <b>SEROPOS.<br/>N = 43</b> | <b>SERONEG.<br/>N = 9</b> | <b>P VALUE</b> |
|---------------------------------------------|--------------------------------|----------------------------|---------------------------|----------------|
| Age (years), mean (SD)                      | 70 (11.6)                      | 68 (10.7)                  | 83 (6.7)                  | <0.001         |
| Age > 70 years, n (%)                       | 30 (58)                        | 21 (49)                    | 9 (100)                   | 0.005          |
| Male, n (%)                                 | 41 (79)                        | 35 (81)                    | 6 (67)                    | 0.325          |
| Cause of nephropathy                        |                                |                            |                           | 0.823          |
| Diabetes and/or vascular nephropathy, n (%) | 40 (77)                        | 32 (74)                    | 8 (89)                    | -              |
| Glomerular disease, n (%)                   | 5 (10)                         | 5 (12)                     | 0 (0)                     | -              |
| Other, n (%)                                | 7 (13)                         | 6 (14)                     | 1 (11)                    | -              |
| <b>Comorbidities</b>                        |                                |                            |                           |                |
| Diabetes mellitus, n (%)                    | 30 (58)                        | 25 (58)                    | 5 (56)                    | 0.887          |
| Hypertension, n (%)                         | 49 (94)                        | 40 (93)                    | 9 (100)                   | 0.414          |
| Immunocompromised, n (%)                    | 7 (13)                         | 6 (13)                     | 1 (11)                    | 1              |
